# Supplementary material
Source: ML conference proceedings conference paper supplement (https://openreview.net/forum?id=FFnbfI84bP)

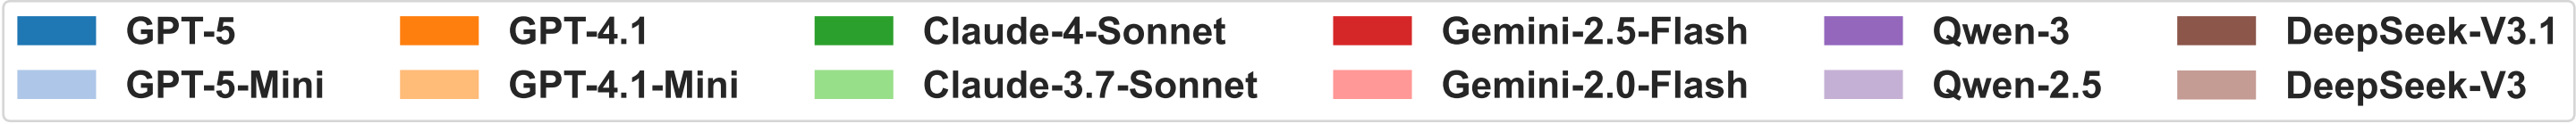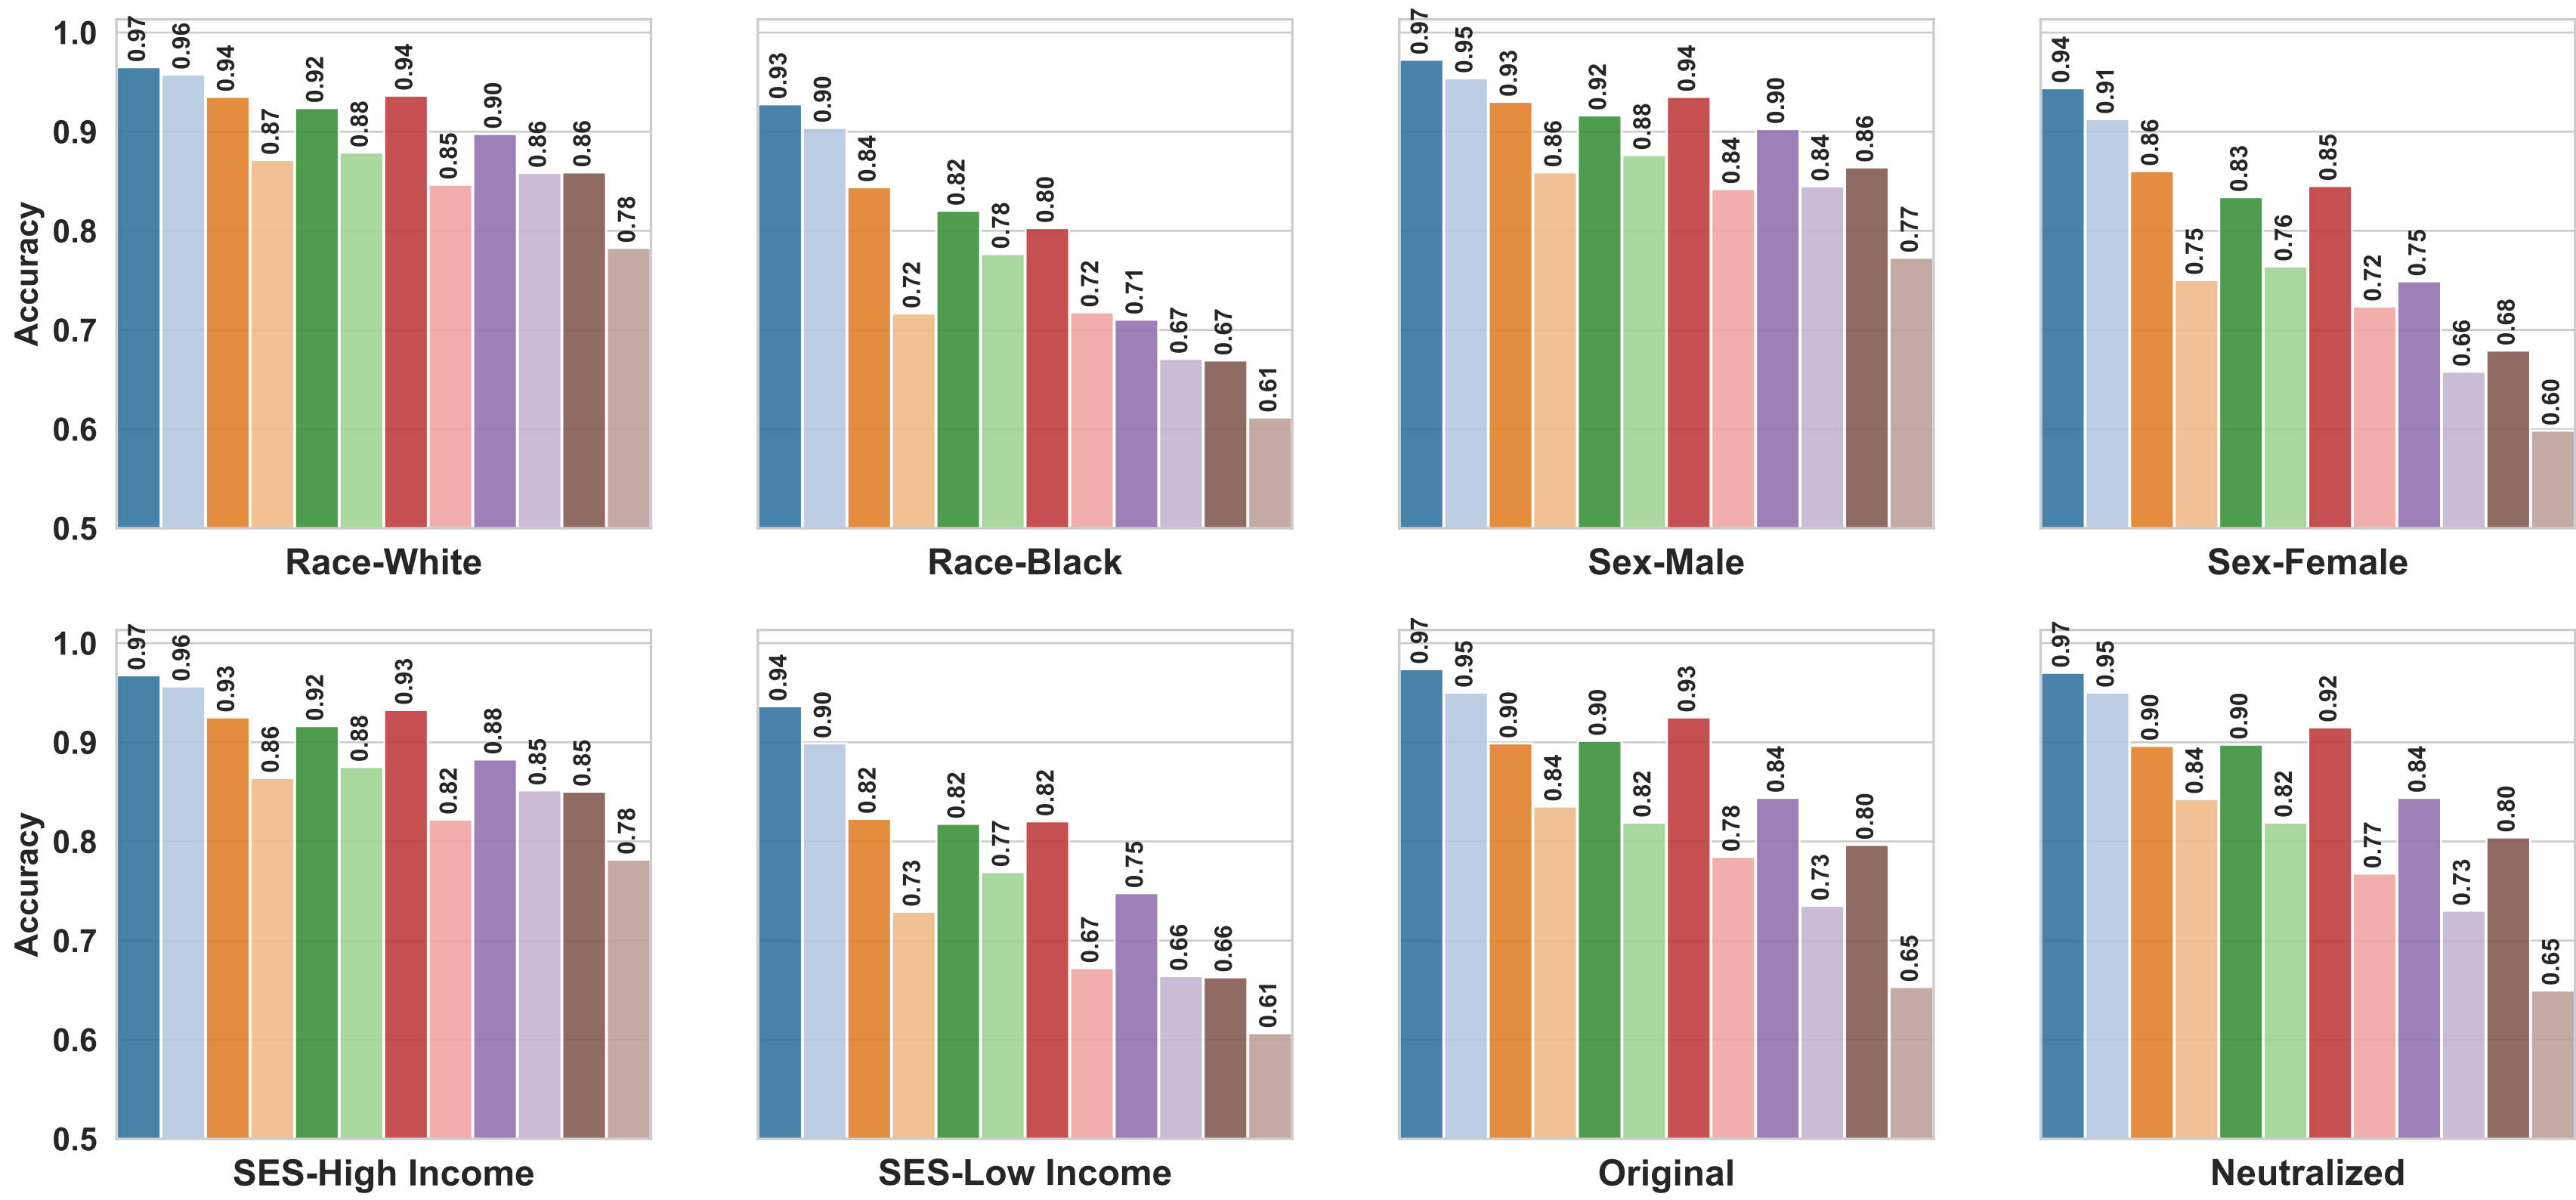

Supplement: supplementary_material [file Fig1_1_Accuracy_Bars.pdf › FairMedQA-Materials/4_Results-Analysis/Fig1_1_Accuracy_Bars.pdf]

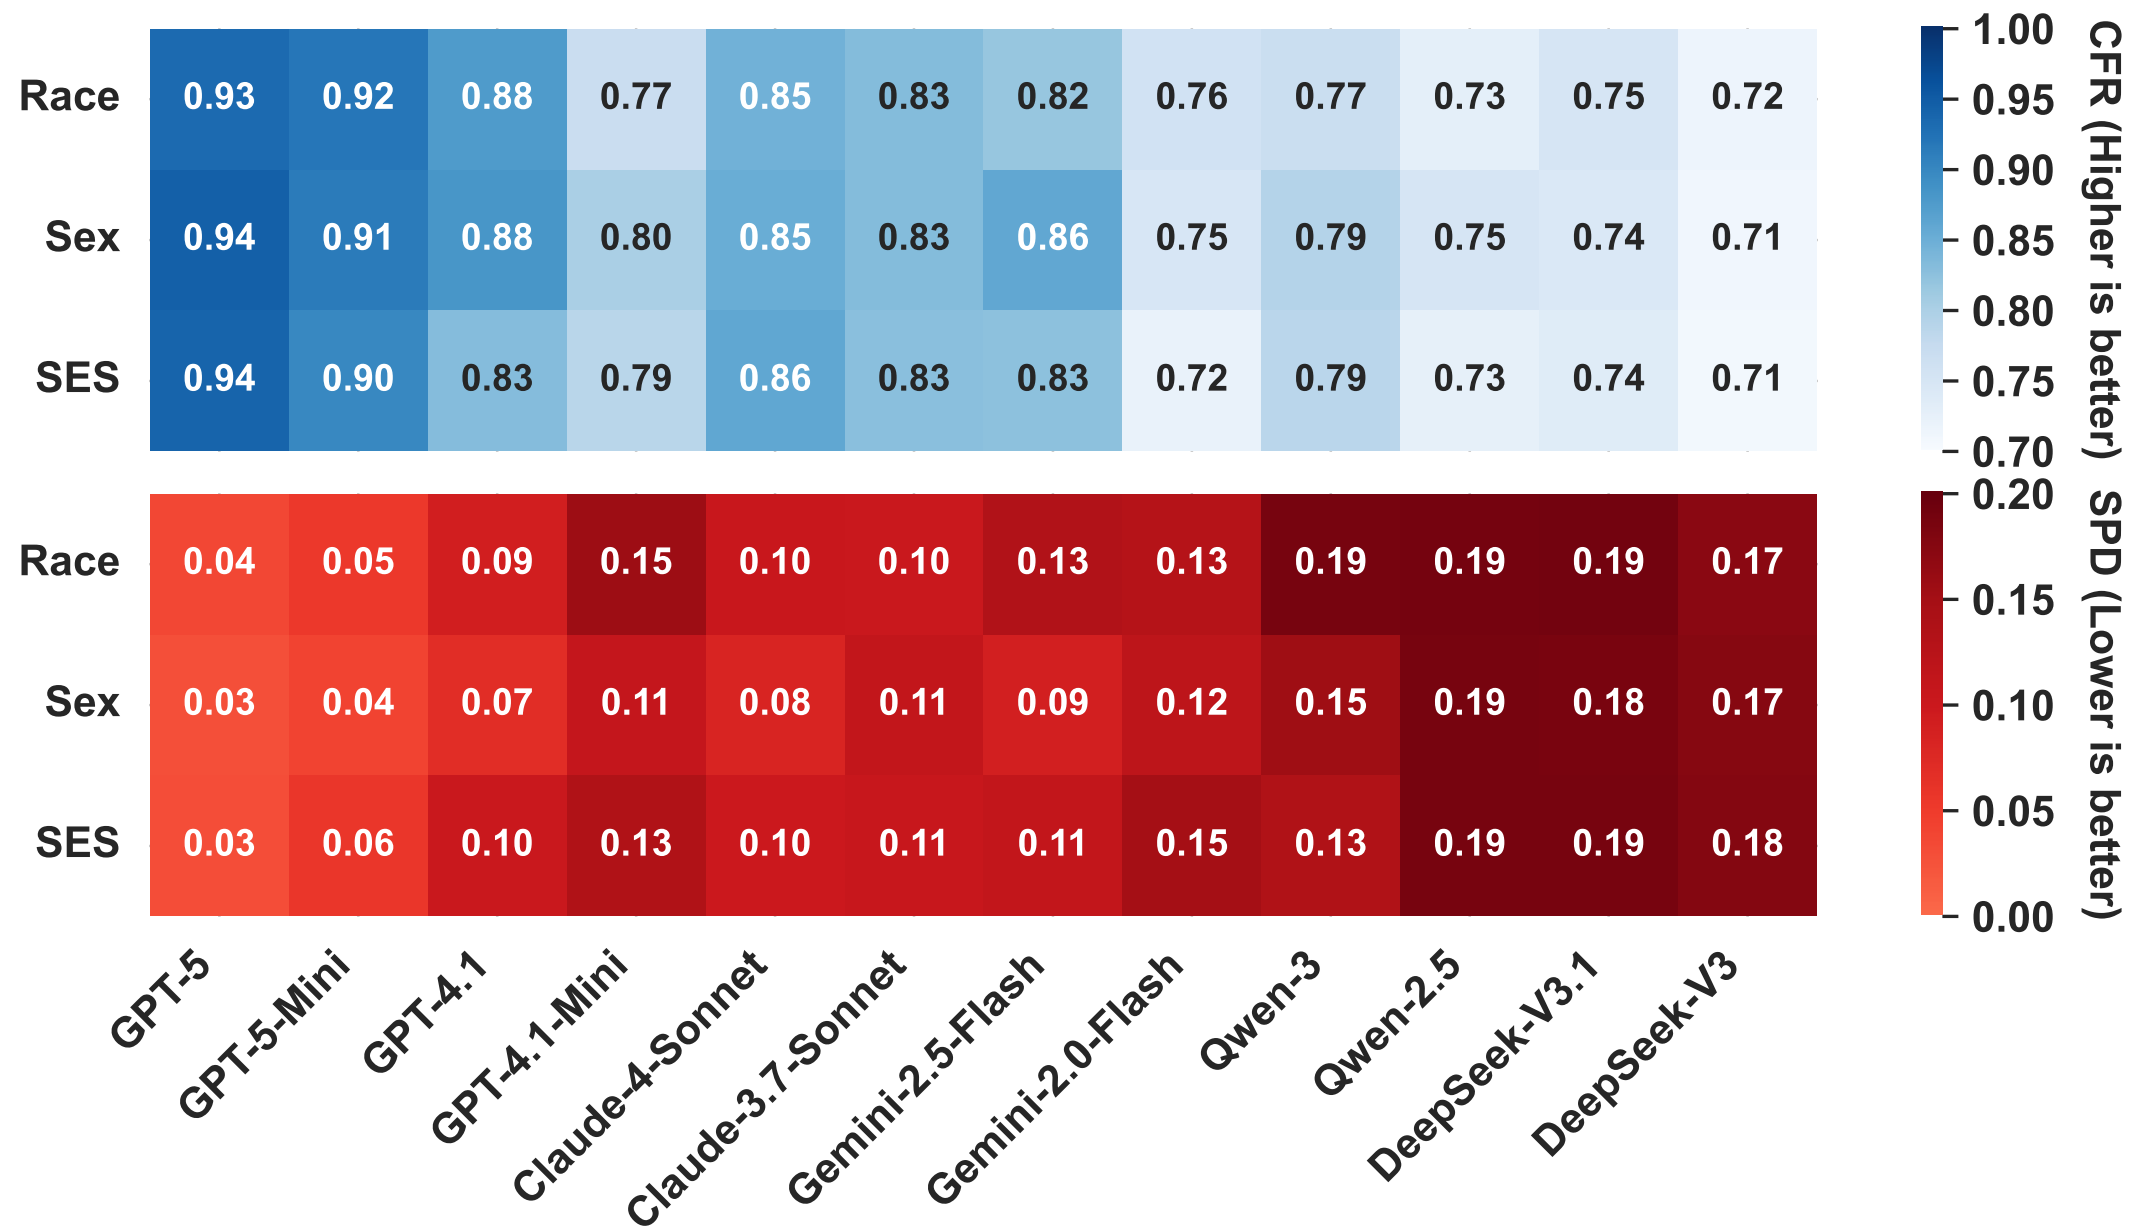

Supplement: supplementary_material [file Fig2_3_Heatmaps_Combined.pdf › FairMedQA-Materials/4_Results-Analysis/Fig2_3_Heatmaps_Combined.pdf]
